# Supplementary material
Source: PubMed Central journal article supplement (PMC7066520)
Supplement: jamacardiol-5-557-s001.pdf [file jamacardiol-5-557-s001.pdf]

## Supplementary Online Content

Allen NB, Krefman AE, Labarthe D, et al. Cardiovascular health trajectories from childhood through middle age and their association with subclinical atherosclerosis. *JAMA Cardiol.* Published online March 11, 2020. doi:10.1001/jamacardio.2020.0140

**eMethods.** Diet Scoring

### **eReferences**

**eTable 1.** Demographics at Baseline and at Follow-up by Cohort

**eTable 2.** Cohort, Age, Sex, and Race Specific Cut Points for Defining High cIMT

**eTable 3.** Baseline Characteristics and Exam Counts by CVH Score Trajectory Group

**eTable 4.** Cross-tabulation of Trajectory Group Membership, for Those With a Full CVH Score Trajectory Group Assignment (N = 3736)

**eTable 5.** Association Between Carotid IMT (mm) and CVH Score Trajectory Group

**eTable 6.** The Association Between High Carotid IMT and CVH Score Trajectory Group

**eTable 7.** The Association Between High Carotid IMT and CVH Score Cohort-specific Trajectory Group, Stratified by Cohort

**eTable 8.** Baseline Characteristics and Exam Counts by Analytic Sample

**eFigure.** CVH Score Trajectories by Age

This supplementary material has been provided by the authors to give readers additional information about their work.

## **eMethods – Diet Scoring**

BHS diet data were collected using 24-hour recalls. The adult questionnaire did not include intake of fish, so consistent with prior i3C publications, saturated fat was used as a surrogate—less than 7% of daily calorie intake coming from saturated fat was considered ideal.<sup>1</sup> Whole grain included the sum of oats, dark bread, and one-third each of pasta and cornbread. The data collected during childhood did include seafood and bread intake, but were not specific to what type of fish or grain, so were excluded when calculating an ideal health score. Ideal health was summed similarly to YFS described below.

YFS diet data were collected using a non-quantitative food frequency questionnaire (FFQ). Data from 2007 was scored according to the full AHA criteria presented in Table 1.<sup>2</sup> However, data prior to 2007 only included fish, fruit and vegetables, and sugar-sweetened beverages. Scoring for these years was altered to reflect that change—ideal health in two or three categories translated to an ideal diet score, one out of three categories was intermediate and none of the categories was considered poor.

CARDIA diet data was collected at years 0, 7, and 20 using the CARDIA dietary history. This dietary history was administered by an interviewer, and included a questionnaire about dietary practices as well as a FFQ.<sup>3</sup> In this study, diet data were scored in the method described by Liu, et al (2012), using quintiles of calcium, potassium, fiber, and saturated fat. Quintile cut points from baseline were carried forward for scoring in exam years 7 and 20.<sup>4</sup>

HB collected annual diet data using an interviewer-administered FFQ. Children (accompanied by an adult) reported consumption of foods during the week prior to the interview. Relevant food items from the FFQ were scored as in Table 1.

STRIP collected 4-day food records of the child's diet every 6-12 months. Foods and nutrients were then calculated based on the Food and Nutrient Database of the Social Insurance Institution, Finland.<sup>5</sup> The foods and nutrients were then used to determine whether the child's energy adjusted consumption met thresholds consistent with the ideal CVH metrics.<sup>6</sup>

## eReferences

1. Oikonen M, Laitinen TT, Magnussen CG, et al. Ideal cardiovascular health in young adult populations from the United States, Finland, and Australia and its association with cIMT: the International Childhood Cardiovascular Cohort Consortium. *Journal of the American Heart Association*. 2013;2(3):e000244.
2. Laitinen TT, Pahkala K, Magnussen CG, et al. Ideal cardiovascular health in childhood and cardiometabolic outcomes in adulthood: the Cardiovascular Risk in Young Finns Study. *Circulation*. 2012;125(16):1971-1978.
3. McDonald A, Van Horn L, Slattery M, et al. The CARDIA dietary history: development, implementation, and evaluation. *J Am Diet Assoc*. 1991;91(9):1104-1112.
4. Liu K, Daviglus ML, Loria CM, et al. Healthy lifestyle through young adulthood and the presence of low cardiovascular disease risk profile in middle age: the Coronary Artery Risk Development in (Young) Adults (CARDIA) study. *Circulation*. 2012;125(8):996-1004.
5. Simell O, Niinikoski H, Rönnemaa T, et al. Cohort Profile: The STRIP Study (Special Turku Coronary Risk Factor Intervention Project), an Infancy-onset Dietary and Life-style Intervention Trial. *International Journal of Epidemiology*. 2009;38(3):650-655.
6. Pahkala K, Hietalampi H, Laitinen TT, et al. Ideal cardiovascular health in adolescence: effect of lifestyle intervention and association with vascular intima-media thickness and elasticity (the Special Turku Coronary Risk Factor Intervention Project for Children [STRIP] study). *Circulation*. 2013;127(21):2088-2096.

**eTable 1. Demographics at baseline and at follow-up by cohort.**

|                                         | <b>Bogalusa</b> | <b>Young Finns</b> | <b>HeartBeat!</b> | <b>CARDIA</b> | <b>STRIP</b> |
|-----------------------------------------|-----------------|--------------------|-------------------|---------------|--------------|
| <b>N (total sample size)</b>            | 10,451          | 3,596              | 678               | 5,115         | 490          |
| <b>Baseline Characteristics</b>         |                 |                    |                   |               |              |
| <b>Female, %</b>                        | 48.75           | 50.95              | 49.12             | 54.5          | 48.57        |
| <b>Race, %</b>                          |                 |                    |                   |               |              |
| White                                   | 64.22           | 100                | 74.63             | 48.45         | 100          |
| Black                                   | 35.78           | -                  | 20.06             | 51.55         | -            |
| Other                                   | -               | -                  | 5.31              | -             | -            |
| <b>Age</b>                              |                 |                    |                   |               |              |
| Youngest age                            | 8               | 9                  | 8.1               | 17            | 15           |
| Average age at baseline                 | 11.9            | 11.9               | 10.8              | 24.8          | 15.41        |
| Average age at end of follow-up         | 19              | 41.4               | 16.8              | 50.2          | 17.96        |
| Oldest Age at follow-up                 | 62.3            | 49                 | 18                | 59            | 19           |
| <b>Avg. Number of Exams</b>             |                 |                    |                   |               |              |
| Total                                   | 3.04            | 7.52               | 8.58              | 8             | 2.19         |
| During Childhood (<20 yrs) <sup>a</sup> | 2.21            | 2.88               | 8.58              | 0.1           | 2.19         |
| Adult (≥ 20 yrs)                        | 2.57            | 4.64               | -                 | 7.9           | -            |

<sup>a</sup>Childhood is defined as <20 years based on the AHA definition of CVH metrics.

**eTable 2. Cohort, age, sex, and race specific cut points for defining high cIMT.**

| Age | Young Finns |        | CARDIA |        |       |        | Bogalusa |        |       |        |
|-----|-------------|--------|--------|--------|-------|--------|----------|--------|-------|--------|
|     | White       |        | White  |        | Black |        | White    |        | Black |        |
|     | Male        | Female | Male   | Female | Male  | Female | Male     | Female | Male  | Female |
| 23  | -           | -      | -      | -      | -     | -      | 0.80     | -      | -     | 0.64   |
| 24  | 0.65        | 0.62   | -      | -      | -     | -      | -        | 0.75   | -     | 0.92   |
| 25  | -           | -      | -      | -      | -     | -      | 0.95     | 0.85   | -     | 0.89   |
| 26  | -           | -      | -      | -      | -     | -      | 0.81     | 1.44   | 1.07  | 0.98   |
| 27  | 0.65        | 0.65   | -      | -      | -     | -      | 0.98     | 0.83   | 0.93  | 1.17   |
| 28  | -           | -      | -      | -      | -     | -      | 1.02     | 1.10   | 1.10  | 1.02   |
| 29  | -           | -      | -      | -      | -     | -      | 1.63     | 1.00   | 1.08  | 1.01   |
| 30  | 0.71        | 0.66   | -      | -      | -     | -      | 1.05     | 0.95   | 1.05  | 0.99   |
| 31  | -           | -      | -      | -      | -     | -      | 0.84     | 1.01   | 0.88  | 0.79   |
| 32  | -           | -      | -      | -      | -     | -      | 0.91     | 0.96   | 0.96  | 1.08   |
| 33  | 0.71        | 0.67   | -      | -      | -     | -      | 1.06     | 0.93   | 1.28  | 0.92   |
| 34  | -           | -      | -      | -      | -     | -      | 1.04     | 1.05   | 1.44  | 1.04   |
| 35  | -           | -      | -      | -      | -     | -      | 1.13     | 1.03   | 0.97  | 0.94   |
| 36  | 0.75        | 0.71   | -      | -      | -     | -      | 1.05     | 0.96   | 0.96  | 1.07   |
| 37  | -           | -      | 0.83   | 0.51   | 0.82  | 0.67   | 1.04     | 1.02   | 1.29  | 1.02   |
| 38  | -           | -      | 0.80   | 0.74   | 0.83  | 0.77   | 1.12     | 1.00   | 1.03  | 1.08   |
| 39  | 0.80        | 0.74   | 0.77   | 0.69   | 0.78  | 0.77   | 1.05     | 1.06   | 1.04  | 0.94   |
| 40  | -           | -      | 0.83   | 0.69   | 0.82  | 0.78   | 0.96     | 1.11   | 1.13  | 1.12   |
| 41  | -           | -      | 0.80   | 0.67   | 0.89  | 0.81   | 0.99     | 1.12   | 0.96  | 1.04   |
| 42  | 0.83        | 0.74   | 0.82   | 0.77   | 0.98  | 0.86   | 0.96     | 0.92   | 1.16  | 0.95   |
| 43  | -           | -      | 0.88   | 0.76   | 0.93  | 0.82   | 0.84     | 0.93   | 1.14  | 1.02   |
| 44  | -           | -      | 0.85   | 0.79   | 0.94  | 0.85   | 1.04     | 0.96   | 1.00  | 1.07   |
| 45  | 0.87        | 0.78   | 0.87   | 0.84   | 0.97  | 0.89   | 0.83     | 1.03   | 0.94  | 0.66   |
| 46  | -           | -      | 0.93   | 0.81   | 0.92  | 0.91   | 0.99     | 0.84   | 0.79  | 0.83   |
| 47  | -           | -      | 0.99   | 0.80   | 0.98  | 0.83   | 0.92     | 0.76   | 0.85  | 0.83   |
| 48  | -           | -      | 0.95   | 0.83   | 0.95  | 0.85   | 0.76     | 0.81   | 0.64  | 0.85   |
| 49  | -           | -      | 0.99   | 0.81   | 0.96  | 0.97   | 0.87     | 0.87   | 0.85  | 1.00   |
| 50  | -           | -      | 1.05   | 0.94   | 1.03  | 0.98   | 0.70     | 0.91   | -     | 0.74   |
| 51  | -           | -      | 1.43   | 0.79   | 1.02  | 0.87   | -        | 0.51   | -     | 0.63   |
| 52  | -           | -      | 0.87   | -      | 0.85  | 0.91   | -        | -      | -     | -      |
| 53  | -           | -      | -      | -      | -     | -      | -        | -      | -     | -      |
| 54  | -           | -      | -      | -      | 0.77  | -      | -        | -      | -     | -      |
| 55  | -           | -      | -      | -      | -     | 1.19   | -        | -      | -     | -      |

Abbreviations: cIMT, carotid intima-media thickness

**eFigure 1. CVH Score Trajectories by Age**

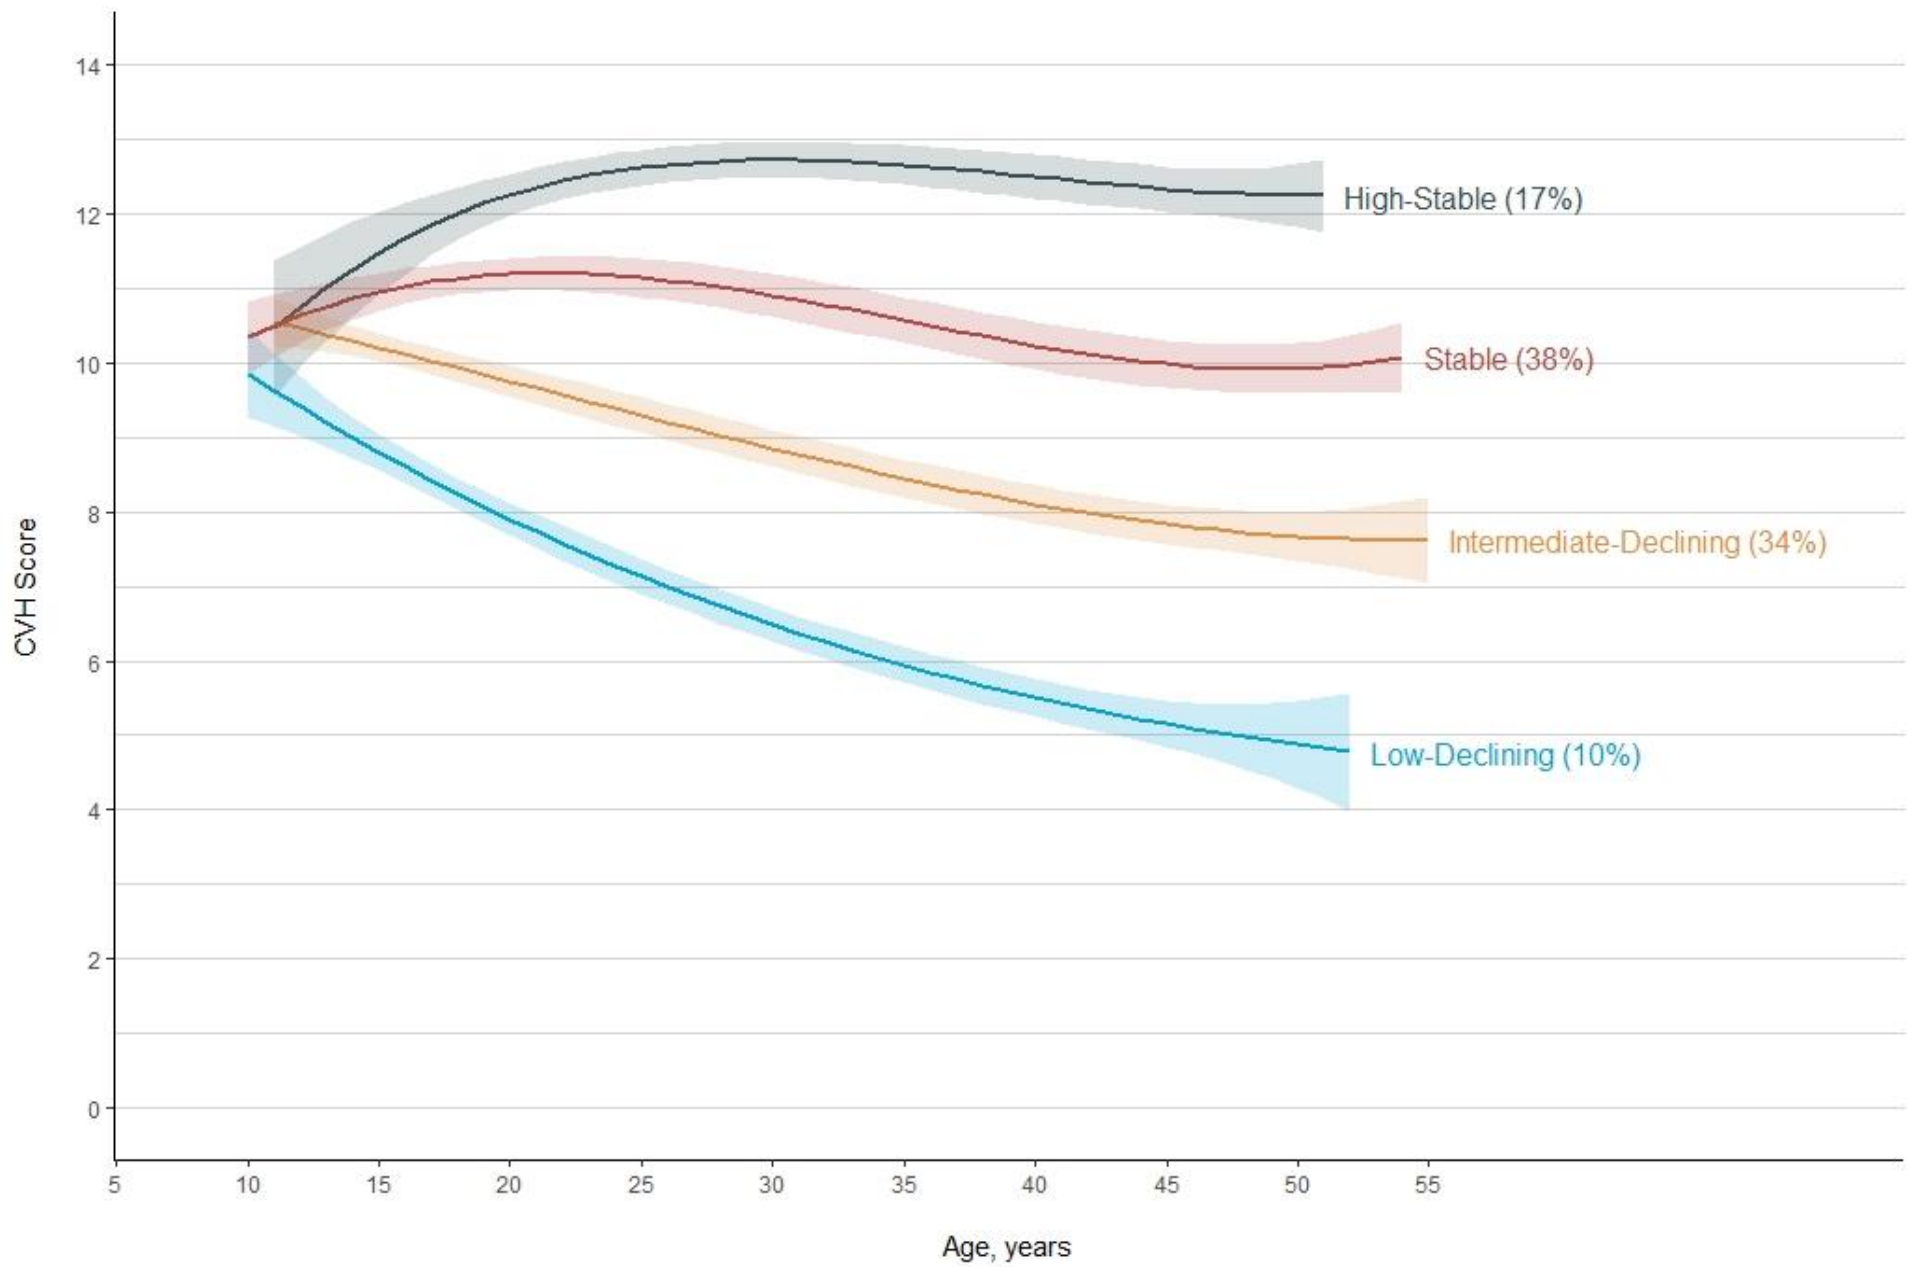

<sup>a</sup> Shaded bars represent 95% confidence intervals



**eTable 3. Baseline characteristics and exam counts by CVH score trajectory group.<sup>a</sup>**

|                                                 | High - Stable  | Stable         | Intermediate-Declining | Low - Declining | Overall        | p-value |
|-------------------------------------------------|----------------|----------------|------------------------|-----------------|----------------|---------|
| <b>N (total sample size)</b>                    | 656            | 1445           | 1287                   | 375             | 3763           | <0.001  |
| <b>%</b>                                        | 17.4           | 38.4           | 34.2                   | 10              | 100            |         |
| <b>Baseline Characteristics<sup>b</sup></b>     |                |                |                        |                 |                |         |
| <b>Female, N (%)</b>                            | 386 (58.84)    | 828 (57.30)    | 707 (54.93)            | 159 (42.40)     | 2080 (55.28)   | <0.001  |
| <b>Race, N (%)</b>                              |                |                |                        |                 |                |         |
| White                                           | 531 (80.95)    | 931 (64.43)    | 870 (67.60)            | 299 (79.73)     | 2631 (69.92)   | <0.001  |
| Black                                           | 125 (19.05)    | 511 (35.36)    | 416 (32.32)            | 76 (20.27)      | 1128 (29.98)   |         |
| Other                                           | 0 (0.00)       | 3 (0.21)       | 1 (0.08)               | 0 (0.00)        | 4 (0.11)       |         |
| <b>Age, Mean (SD)</b>                           | 25.00 (3.74)   | 22.71 (6.01)   | 19.00 (7.16)           | 16.06 (6.50)    | 21.17 (6.76)   | <0.001  |
| <b>Age group, N (%)</b>                         |                |                |                        |                 |                |         |
| 8-11 years                                      | 3 (0.46)       | 110 (7.61)     | 242 (18.80)            | 99 (26.40)      | 454 (12.06)    | <0.001  |
| 12-19 years                                     | 69 (10.52)     | 268 (18.55)    | 446 (34.65)            | 186 (49.60)     | 969 (25.75)    |         |
| ≥ 20 years                                      | 584 (89.02)    | 1067 (73.84)   | 599 (46.54)            | 90 (24.00)      | 2340 (62.18)   |         |
| <b>Cohort, N (%)</b>                            |                |                |                        |                 |                |         |
| Young Finns                                     | 4 (0.61)       | 214 (14.81)    | 529 (41.10)            | 215 (57.33)     | 962 (25.56)    | <0.001  |
| Project HeartBeat!                              | 0 (0.00)       | 20 (1.38)      | 16 (1.24)              | 4 (1.07)        | 40 (1.06)      |         |
| CARDIA                                          | 648 (98.78)    | 1167 (80.76)   | 639 (49.65)            | 102 (27.20)     | 2556 (67.92)   |         |
| STRIP                                           | 4 (0.61)       | 44 (3.04)      | 103 (8.00)             | 54 (14.40)      | 205 (5.45)     |         |
| <b>Clinical measures, Mean (SD)</b>             |                |                |                        |                 |                |         |
| BMI, kg/m <sup>2</sup>                          | 21.69 (2.16)   | 22.59 (4.04)   | 22.62 (6.08)           | 22.81 (6.69)    | 22.47 (4.93)   | <0.001  |
| BMI %, by age and sex <sup>c</sup>              | 38.27 (20.87)  | 42.73 (25.93)  | 44.65 (25.92)          | 56.21 (29.69)   | 46.12 (26.98)  | <0.001  |
| Systolic BP, mmHg                               | 107.05 (9.26)  | 110.27 (10.48) | 113.18 (11.54)         | 117.53 (12.23)  | 111.42 (11.23) | <0.001  |
| SBP percentile <sup>c</sup>                     | 24.71 (20.46)  | 38.58 (24.61)  | 53.10 (30.22)          | 66.11 (29.63)   | 45.72 (29.77)  | <0.001  |
| Diastolic BP, mmHg                              | 67.54 (8.16)   | 67.61 (9.23)   | 68.27 (10.22)          | 69.38 (10.45)   | 68 (9.55)      | 0.006   |
| DBP percentile <sup>c</sup>                     | 40.34 (25.06)  | 42.14 (23.91)  | 38.94 (22.88)          | 41.56 (25.90)   | 40.68 (24.01)  | 0.671   |
| Total Cholesterol, mg/dL                        | 164.91 (25.30) | 177.68 (32.40) | 190.72 (37.27)         | 202.21 (39.91)  | 182.34 (35.67) | <0.001  |
| Fasting glucose, mg/dL                          | 80.94 (6.96)   | 81.66 (9.18)   | 84.09 (14.93)          | 88.89 (21.91)   | 82.58 (11.85)  | <0.001  |
| <b>Ideal behavior scores, N (%)<sup>d</sup></b> |                |                |                        |                 |                |         |

|                   |             |              |             |             |              |        |
|-------------------|-------------|--------------|-------------|-------------|--------------|--------|
| Smoking           | 600 (91.46) | 1072 (74.19) | 796 (61.85) | 183 (48.80) | 2651 (70.45) | <0.001 |
| Diet              | 472 (71.95) | 569 (39.38)  | 310 (24.09) | 54 (14.40)  | 1405 (37.34) | <0.001 |
| Physical Activity | 384 (58.54) | 529 (36.61)  | 240 (18.65) | 32 (8.53)   | 1185 (31.49) | <0.001 |

|                                                        | High - Stable | Stable       | Intermediate-Declining | Low - Declining | Overall      | p-value |
|--------------------------------------------------------|---------------|--------------|------------------------|-----------------|--------------|---------|
| <b>N (total sample size)</b>                           | 656           | 1445         | 1287                   | 375             | 3763         | <0.001  |
| <b>%</b>                                               | 17.4          | 38.4         | 34.2                   | 10              | 100          |         |
| <b>Baseline Characteristics<sup>b</sup>, continued</b> |               |              |                        |                 |              |         |
| <b>Maternal education, N (%)<sup>e</sup></b>           |               |              |                        |                 |              |         |
| Less than 6 years                                      | 5 (0.77)      | 45 (3.28)    | 78 (6.76)              | 22 (6.94)       | 150 (4.25)   | <0.001  |
| 6-9 years                                              | 15 (2.31)     | 149 (10.85)  | 289 (25.04)            | 133 (41.96)     | 586 (16.59)  |         |
| 9-12 years                                             | 236 (36.36)   | 651 (47.41)  | 467 (40.47)            | 111 (35.02)     | 1477 (41.81) |         |
| 12-16 years                                            | 285 (43.91)   | 412 (30.01)  | 203 (17.59)            | 27 (8.52)       | 948 (26.83)  |         |
| >16 years (grad school)                                | 108 (16.64)   | 116 (8.45)   | 117 (10.14)            | 24 (7.57)       | 372 (10.53)  |         |
| <b>Paternal education, N (%)<sup>e</sup></b>           |               |              |                        |                 |              |         |
| Less than 6 years                                      | 14 (2.15)     | 68 (4.99)    | 86 (7.53)              | 16 (5.08)       | 184 (5.25)   | <0.001  |
| 6-9 years                                              | 27 (4.15)     | 189 (13.86)  | 363 (31.79)            | 134 (42.54)     | 714 (20.36)  |         |
| 9-12 years                                             | 178 (27.38)   | 607 (44.50)  | 425 (37.22)            | 115 (36.51)     | 1329 (37.9)  |         |
| 12-16 years                                            | 257 (39.54)   | 340 (24.93)  | 199 (17.43)            | 36 (11.43)      | 849 (24.21)  |         |
| >16 years (grad school)                                | 174 (26.77)   | 160 (11.73)  | 69 (6.04)              | 14 (4.44)       | 431 (12.29)  |         |
| <b>Number of Exams with Clinical CV Scores</b>         |               |              |                        |                 |              |         |
| <b>Total, Mean (SD)</b>                                | 3.00 (0.00)   | 3.02 (0.15)  | 3.06 (0.23)            | 3.08 (0.27)     | 3.04 (0.18)  | <0.001  |
| <b>N with cIMT measurements</b>                        |               |              |                        |                 |              |         |
| <b>Analytic sample, N (%)</b>                          | 615 (93.75)   | 1280 (88.58) | 1096 (85.16)           | 311 (82.93)     | 3302 (87.75) | <0.001  |

**eTable 3 (continued).  
Baseline characteristics and exam counts by CVH score trajectory group.<sup>a</sup>**

Abbreviations: CVH, Cardiovascular health; cIMT, carotid intima-media thickness; BMI, body mass index; BP, blood pressure; SBP, systolic blood pressure; DBP, diastolic blood pressure  
SI conversion factors: To convert total cholesterol and fasting glucose to mmol/L, multiply values by 0.0259.

<sup>a</sup> 4-group, cubic order trajectory model.

<sup>b</sup> Baseline age group and clinical measures are taken from a participant's first exam, even if that exam has a missing CVH score.

<sup>c</sup> BMI, SBP, and DBP percentiles only available for those who were <20 years old at baseline. N=1414 for BMI, N=461 for BP.

<sup>d</sup> Ideal behavior scores translate to: Smoking: never tried, never smoker, or quit >12 months ago in those >20 years old. Physical activity: ≥60 minutes of moderate or vigorous activity daily for those under 20 years old; ≥150 minutes of moderate or ≥75 minutes of vigorous exercise per week for those ≥20 years old. Diet: 4-5 components of healthy diet.

<sup>e</sup> Maternal and paternal education data was not available for all individuals. Father, N=3507 (93%); Mother, N=3533 (94%)

**eTable 4. Cross-tabulation of trajectory group membership, for those with a full CVH score trajectory group assignment (N=3763).**

|                                     | Full CVH score Trajectory Group |            |                        |               |
|-------------------------------------|---------------------------------|------------|------------------------|---------------|
| Clinical CVH Score Trajectory Group | High-Stable                     | Stable     | Intermediate-Declining | Low-Declining |
| High-Late Decline                   | 394 (57.6)                      | 242 (35.4) | 48 (7.0)               | 0 (0)         |
| High-Moderate Decline               | 178 (18.8)                      | 497 (52.4) | 262 (27.6)             | 12 (1.2)      |
| High-Early Decline                  | 10 (0.9)                        | 398 (33.5) | 609 (51.3)             | 170 (14.3)    |
| Intermediate-Late Decline           | 74 (11.5)                       | 299 (46.6) | 244 (38.0)             | 25 (3.9)      |
| Intermediate-Early decline          | 0 (0)                           | 9 (3.0)    | 124 (41.2)             | 168 (55.8)    |

Abbreviations: CVH, cardiovascular health

Numbers presented as N(row %).

Spearman correlation coefficient between clinical CVH trajectory group and full CVH score trajectory group = 0.233.

**eTable 5. Association between carotid IMT (mm) and CVH score trajectory group.**

|                                               | Adjusted <sup>b</sup>      |         | Adjusted + Baseline score <sup>c</sup> |         | Adjusted + Proximal score <sup>d</sup> |         |
|-----------------------------------------------|----------------------------|---------|----------------------------------------|---------|----------------------------------------|---------|
|                                               | Point estimate<br>(95% CI) | p-value | Point estimate<br>(95% CI)             | p-value | Point estimate<br>(95% CI)             | p-value |
| <b>CVH Score Trajectory Group<sup>a</sup></b> |                            |         |                                        |         |                                        |         |
| High-Stable                                   | 0.631 (0.617 - 0.646)      | -       | 0.717 (0.664 - 0.77)                   | -       | 0.744 (0.699 - 0.79)                   | -       |
| Stable                                        | 0.676 (0.648 - 0.705)      | <0.001  | 0.757 (0.689 - 0.824)                  | <0.001  | 0.77 (0.709 - 0.831)                   | 0.002   |
| Intermediate-Declining                        | 0.704 (0.673 - 0.736)      | <0.001  | 0.778 (0.705 - 0.851)                  | <0.001  | 0.781 (0.711 - 0.851)                  | 0.004   |
| Low-Declining                                 | 0.73 (0.695 - 0.766)       | <0.001  | 0.796 (0.717 - 0.875)                  | <0.001  | 0.786 (0.708 - 0.864)                  | 0.013   |

Abbreviations: IMT, intima-media thickness; cIMT, carotid intima-media thickness; CVH, Cardiovascular health; CI, confidence interval

<sup>a</sup> Full CVH score: Sum of BP, BMI, Cholesterol, Blood sugar, diet, physical activity, and smoking scores. Highest possible score=14. Trajectory groups based on 4-group, cubic order model. Trajectory group was assigned to those with full CVH scores at ≥3 distinct age (year) integers.

<sup>b</sup> Adjusted for age, gender, race, cohort, maternal and paternal education, and baseline smoking, physical activity, and diet scores.

<sup>c</sup> Adjusted for age, gender, race, cohort, maternal and paternal education, and baseline smoking, physical activity, and diet scores and baseline CVH score. Baseline CVH score is the earliest recorded CVH score per participant.

<sup>d</sup> Adjusted for age, gender, race, cohort, maternal and paternal education, and baseline smoking, physical activity, and diet scores, and proximal CVH score. Proximal CVH score is the clinical CVH score from the exam at or before the cIMT measurement. 99.5% of scores come from the same exam as the cIMT measurement, while 0.5% come from one exam prior.

**eTable 6. The association between high carotid IMT<sup>a</sup> and CVH score trajectory group.**

|                                                | Adjusted model <sup>b</sup> |         | Adjusted + Baseline score <sup>b</sup> |         | Adjusted + Proximal score <sup>b</sup> |         |
|------------------------------------------------|-----------------------------|---------|----------------------------------------|---------|----------------------------------------|---------|
|                                                | OR (95% CI)                 | p-value | OR (95% CI)                            | p-value | OR (95% CI)                            | p-value |
| <b>CVH Score Trajectory Group <sup>c</sup></b> |                             |         |                                        |         |                                        |         |
| High-Stable                                    | 1.00 (ref.)                 |         | 1.00 (ref.)                            |         | 1.00 (ref.)                            |         |
| Stable                                         | 2.14 (1.31 - 3.48)          | 0.002   | 1.98 (1.20 - 3.26)                     | 0.007   | 1.66 (0.98 - 2.83)                     | 0.060   |
| Intermediate-Declining                         | 3.62 (2.16 - 6.07)          | <0.001  | 3.06 (1.73 - 5.40)                     | <0.001  | 2.25 (1.15 - 4.42)                     | 0.018   |
| Low-Declining                                  | 4.97 (2.70 - 9.16)          | <0.001  | 3.75 (1.83 - 7.67)                     | <0.001  | 2.38 (0.98 - 5.78)                     | 0.057   |

Abbreviations: IMT, intima-media thickness; cIMT, carotid intima-media thickness; CVH, Cardiovascular health

<sup>a</sup> See eTable 2 for cohort, race, sex, and age-specific 90<sup>th</sup> percentile cIMT cut points. High cIMT is defined as a cIMT value at or above the given cut point.

<sup>b</sup> Adjusted models include trajectory group, age (centered), cohort, race, gender, maternal and paternal education, baseline diet, physical activity and smoking scores, and either baseline CVH score (the earliest recorded clinical CVH score per participant) or proximal CVH score (The CVH score from the exam at or before the cIMT measurement. 99.5% of scores come from the same exam as the cIMT measurement, while 0.5% come from one exam prior.).

<sup>c</sup> Full CVH score: Sum of BP, BMI, Cholesterol, Blood sugar, diet, physical activity, and smoking scores. Highest possible score=14. Trajectory groups based on 4-group, cubic order model. Trajectory group was assigned to those with full CVH scores at  $\geq 3$  distinct age (year) integers.

**eTable 7. The association between high carotid IMT<sup>a</sup> and CVH score<sup>b</sup> cohort-specific trajectory group, stratified by cohort.**

|                           | N(%) High<br>cIMT | Adjusted model <sup>c</sup> | Adjusted + Baseline<br>score <sup>c</sup> | Adjusted + Proximal<br>score <sup>c</sup> |
|---------------------------|-------------------|-----------------------------|-------------------------------------------|-------------------------------------------|
|                           |                   | OR (95% CI)                 | OR (95% CI)                               | OR (95% CI)                               |
| <b>CARDIA, N=2341</b>     | <b>244 (10.4)</b> |                             |                                           |                                           |
| High-Stable               | 13 (4.3)          | 1.00 (Ref.)                 | 1.00 (Ref.)                               | 1.00 (Ref.)                               |
| Stable                    | 81 (7.8)          | 1.87 (1.01 - 3.47)          | 1.62 (0.86 - 3.03)                        | 1.29 (0.66 - 2.49)                        |
| Intermediate-Declining    | 123 (14.5)        | 3.74 (1.96 - 7.14)          | 2.64 (1.31 - 5.32)                        | 1.68 (0.74 - 3.83)                        |
| Low-Declining             | 27 (16.9)         | 4.41 (1.98 - 9.81)          | 2.31 (0.89 - 5.94)                        | 1.23 (0.39 - 3.84)                        |
| <b>Young Finns, N=961</b> | <b>105 (10.9)</b> |                             |                                           |                                           |
| High-Rapid Decline        | 16 (11.3)         | 1.00 (Ref.)                 | 1.00 (Ref.)                               | 1.00 (Ref.)                               |
| Stable                    | 15 (6.0)          | 0.48 (0.22 - 1.04)          | 0.48 (0.22 - 1.03)                        | 0.41 (0.16 - 1.05)                        |
| Intermediate-Declining    | 40 (10.2)         | 0.86 (0.46 - 1.61)          | 0.9 (0.46 - 1.74)                         | 0.8 (0.40 - 1.58)                         |
| Low-Declining             | 34 (19.7)         | 1.92 (0.99 - 3.74)          | 2.11 (0.98 - 4.54)                        | 2.05 (1.01 - 4.15)                        |

Abbreviations: IMT, intima-media thickness; CVH, cardiovascular health; CI, confidence interval; cIMT, carotid intima-media thickness

<sup>a</sup>See eTable 2 for cohort, race, sex, and age-specific 90<sup>th</sup> percentile cIMT cut points. High cIMT is defined as a cIMT value at or above the given cut point.

<sup>b</sup>Full CVH score: Sum of BP, BMI, Cholesterol, Blood sugar, diet, physical activity, and smoking scores. Highest possible score=14. Trajectory groups based on 4-group, cubic order model. Trajectory group was assigned to those with full CVH scores at ≥3 distinct age (year) integers. Separate trajectory models were built for each cohort.

<sup>c</sup>Adjusted models include trajectory group, age (centered by cohort-specific mean), race (CARDIA only), gender, maternal and paternal education, baseline diet, physical activity and smoking scores, and either baseline CVH score (the earliest recorded clinical CVH score per participant) or proximal CVH score (The CVH score from the exam at or before the cIMT measurement. 95% of scores come from the same exam as the cIMT measurement).



**eTable 8. Baseline characteristics and exam counts by analytic sample.**

|                                                   | Total sample   | 3+ Clinical CVH scores | 3+ Clinical CVH scores + cIMT |
|---------------------------------------------------|----------------|------------------------|-------------------------------|
| <b>N (total sample size)</b>                      | 20,330         | 9388                   | 6287                          |
| <b>Baseline Characteristics</b>                   |                |                        |                               |
| <b>Female, N (%)</b>                              | 10285 (50.59)  | 5146 (54.81)           | 3571 (56.80)                  |
| <b>Race, N (%)</b>                                |                |                        |                               |
| White                                             | 13780 (67.78)  | 6228 (66.34)           | 4483 (71.31)                  |
| Black                                             | 6514 (32.04)   | 3149 (33.54)           | 1804 (28.69)                  |
| Other                                             | 36 (0.18)      | 11 (0.12)              | 0 (0.00)                      |
| <b>Age, Mean (SD)</b>                             | 15.07 (6.96)   | 17.45 (7.53)           | 18.52 (7.52)                  |
| <b>Age group, N (%)</b>                           |                |                        |                               |
| 8-11 years                                        | 9366 (46.07)   | 3259 (34.71)           | 1721 (27.37)                  |
| 12-19 years                                       | 6143 (30.22)   | 2327 (24.79)           | 1646 (26.18)                  |
| ≥ 20 years                                        | 4821 (23.71)   | 3802 (40.5)            | 2920 (46.45)                  |
| <b>Cohort, N (%)</b>                              |                |                        |                               |
| Young Finns                                       | 3596 (17.69)   | 1962 (20.9)            | 1955 (31.10)                  |
| Project HeartBeat!                                | 678 (3.33)     | 114 (1.21)             | 0 (0.00)                      |
| CARDIA                                            | 5115 (25.16)   | 4200 (44.74)           | 3198 (50.87)                  |
| Bogalusa                                          | 10451 (51.41)  | 2907 (30.97)           | 1134 (18.04)                  |
| STRIP                                             | 490 (2.41)     | 205 (2.18)             | 0 (0.00)                      |
| <b>Clinical measures, Mean (SD)</b>               |                |                        |                               |
| BMI, kg/m <sup>2</sup>                            | 20.30 (4.94)   | 21.05 (5.22)           | 21.43 (5.16)                  |
| BMI %, by age and sex <sup>a</sup>                | 51.60 (29.75)  | 48.43 (29.15)          | 47.30 (28.69)                 |
| Systolic BP, mmHg                                 | 106.29 (11.91) | 107.85 (12.01)         | 109.40 (11.52)                |
| SBP percentile <sup>a</sup>                       | 41.95 (25.02)  | 41.72 (25.65)          | 40.00 (24.84)                 |
| Diastolic BP, mmHg                                | 57.36 (14.85)  | 61.14 (14.45)          | 64.25 (13.03)                 |
| DBP percentile <sup>a</sup>                       | 22.31 (21.43)  | 22.59 (22.17)          | 24.42 (23.61)                 |
| Total Cholesterol, mg/dL                          | 174.46 (34.14) | 177.43 (34.58)         | 182.58 (35.34)                |
| Fasting glucose, mg/dL                            | 84.39 (13.67)  | 82.71 (12.06)          | 83.85 (12.32)                 |
| <b>Ideal behavior scores, N (%)<sup>b</sup></b>   |                |                        |                               |
| Smoking                                           | 12992 (71.03)  | 6873 (73.21)           | 4578 (72.82)                  |
| Diet                                              | 3059 (28.42)   | 2341 (29.66)           | 1949 (31.00)                  |
| Physical Activity                                 | 3120 (27.65)   | 2333 (29.7)            | 1729 (27.50)                  |
| <b>Maternal education, N (%)<sup>c</sup></b>      |                |                        |                               |
| Less than 6 years                                 | 566 (4.13)     | 330 (4.4)              | 304 (4.84)                    |
| 6-9 years                                         | 2240 (16.36)   | 1199 (15.98)           | 1124 (17.88)                  |
| 9-12 years                                        | 5786 (42.26)   | 3321 (44.27)           | 2656 (42.25)                  |
| 12-16 years                                       | 4000 (29.22)   | 1969 (26.25)           | 1596 (25.39)                  |
| >16 years (grad school)                           | 1099 (8.03)    | 682 (9.09)             | 607 (9.65)                    |
| <b>Paternal education, N (%)<sup>c</sup></b>      |                |                        |                               |
| Less than 6 years                                 | 625 (5.10)     | 425 (5.84)             | 368 (5.85)                    |
| 6-9 years                                         | 2461 (20.09)   | 1402 (19.27)           | 1310 (20.84)                  |
| 9-12 years                                        | 4893 (39.94)   | 3007 (41.32)           | 2570 (40.88)                  |
| 12-16 years                                       | 3238 (26.43)   | 1709 (23.48)           | 1420 (22.59)                  |
| >16 years (grad school)                           | 1034 (8.44)    | 734 (10.09)            | 619 (9.85)                    |
| <b>Number of exams with CVH scores, Mean (SD)</b> |                |                        |                               |
| Clinical CVH Score                                | 2.79 (2.08)    | 4.68 (1.43)            | 5.00 (1.32)                   |
| Full CVH Score                                    | 0.94 (1.22)    | 1.73 (1.29)            | 2.14 (1.16)                   |

Abbreviations: CVH: Cardiovascular health; cIMT: carotid intima-media thickness; BMI: body mass index; BP: blood pressure; SBP: systolic blood pressure; DBP: diastolic blood pressure

SI conversion factors: To convert total cholesterol and fasting glucose to mmol/L, multiply values by 0.0259.

<sup>a</sup> BMI, SBP, and DBP percentiles only available for those who were <20 years old at baseline.

<sup>b</sup> Behavior scores were not captured at baseline for every participant—these scores represent their first available score for that behavior. Smoking scores available for N=18,292 (90%); Diet, N=11,360 (56%); Physical activity, N=11,285 (56%). Ideal behavior scores translate to: Smoking: never tried,

never smoker, or quit >12 months ago in those >20 years old. Physical activity:  $\geq 60$  minutes of moderate or vigorous activity daily for those under 20 years old;  $\geq 150$  minutes of moderate or  $\geq 75$  minutes of vigorous exercise per week for those  $\geq 20$  years old. Diet: 4-5 components of healthy diet.  
° Maternal and paternal education data was not available for all individuals. Father, N=12,251 (60%); Mother, N=13,691 (67%).
